# Supplementary material for: Impact of white-mater mask selection on DTI histogram-based metrics as potential biomarkers in cerebral small vessel disease
Source: Research Square preprint supplement (doi:10.21203/rs.3.rs-703117/v1), 2021-07-19

1. **Supplementary Material**

**Table S1 - Summary of demographics and clinical data.** Significant group differences are shown in bold (p<0.05). Numbers represent mean ± standard deviation (or percentage). *Data available for 16 patients; ** Data available for 15 patients; BP = Blood Pressure; sSVD=Sporadic Small Vessel Disease.

|  | **SVD (N=17)** | | **Healthy controls**  **(N = 12)** | **Group comparison** |
| --- | --- | --- | --- | --- |
| CADASIL  (N=6) | sSVD  (N = 11) |
| **Age (years)** | 50 ± 9 | | 52 ± 6 | p = 0.70 |
| 47 ± 11 | 52 ± 7 | p = 0.44† |
| **Sex (% Female)** | 13 (77) | | 6 (50) | p = 0.14 |
| 4 (67) | 9 (82) | p = 0.28† |
| **Education (years)** | 10 ± 6 | | 17 ± 4 | **p < 0.001** |
| 10 ± 6 | 11 ± 5 | p = 0.72† |
| **Hypertension (%)*** | 10 (62) | | - | - |
| 1 (20) | 9 (82) | **p = 0.02**† |
| **Systolic BP (mmHg)**** | 134 ± 20 | | - | - |
| 135 ± 22 | 133 ± 21 | p = 0.92† |
| **Diastolic BP (mmHg)**** | 79 ± 14 | | - | - |
| 79 ± 12 | 78 ± 16 | p = 0.97† |
| **Diabetes Mellitus (%)*** | 1 (6) | | - | - |
| 0 | 1 (9) | p = 0.49† |
| **Hypercholesterolaemia (%)*** | 9 (56) | | - | - |
| 2 (12) | 7 (41) | p = 0.38† |
| **Previous Stroke (%)*** | 4 (25) | | - | - |
| 2 (12) | 2 (12) | p = 0.35† |
| **Smoker (%)*** | 5 (31) | | - | - |
| 1 (6) | 4 (24) | p = 0.51† |
| **History of depression (%)*** | 8 (50) | | - | - |
| 2 (12) | 6 (35) | p = 0.59† |
| †Comparison between CADASIL and sSVD groups. | | | | |

**Table S2 – Composite scores used for evaluation of executive function and processing speed: individual tests used to obtain the composite scores.**

| **Cognitive Index** | **Neuropsychological Test** | **Measures** | **Composite Score** |
| --- | --- | --- | --- |
| Executive Function | Stroop (Fernandes, 2013) | Total Interference Score | Stroop+TMTB-A=  Average of *z*-scores |
| Trail Making Test (Cavaco et al., 2013) | Part B-A - Time to complete |
| Processing Speed | Trail Making Test (Cavaco et al., 2013) | Part B - Time to complete | TMTA+TMTB=  Average of *z*-scores |
| Part A - Time to complete |

**Figure S1** – **Illustrative examples of FA histograms from all subjects obtained using the different masks: TBSS (left) and NAWM (right);** and demonstrating the histogram-based metrics (median and peak width).


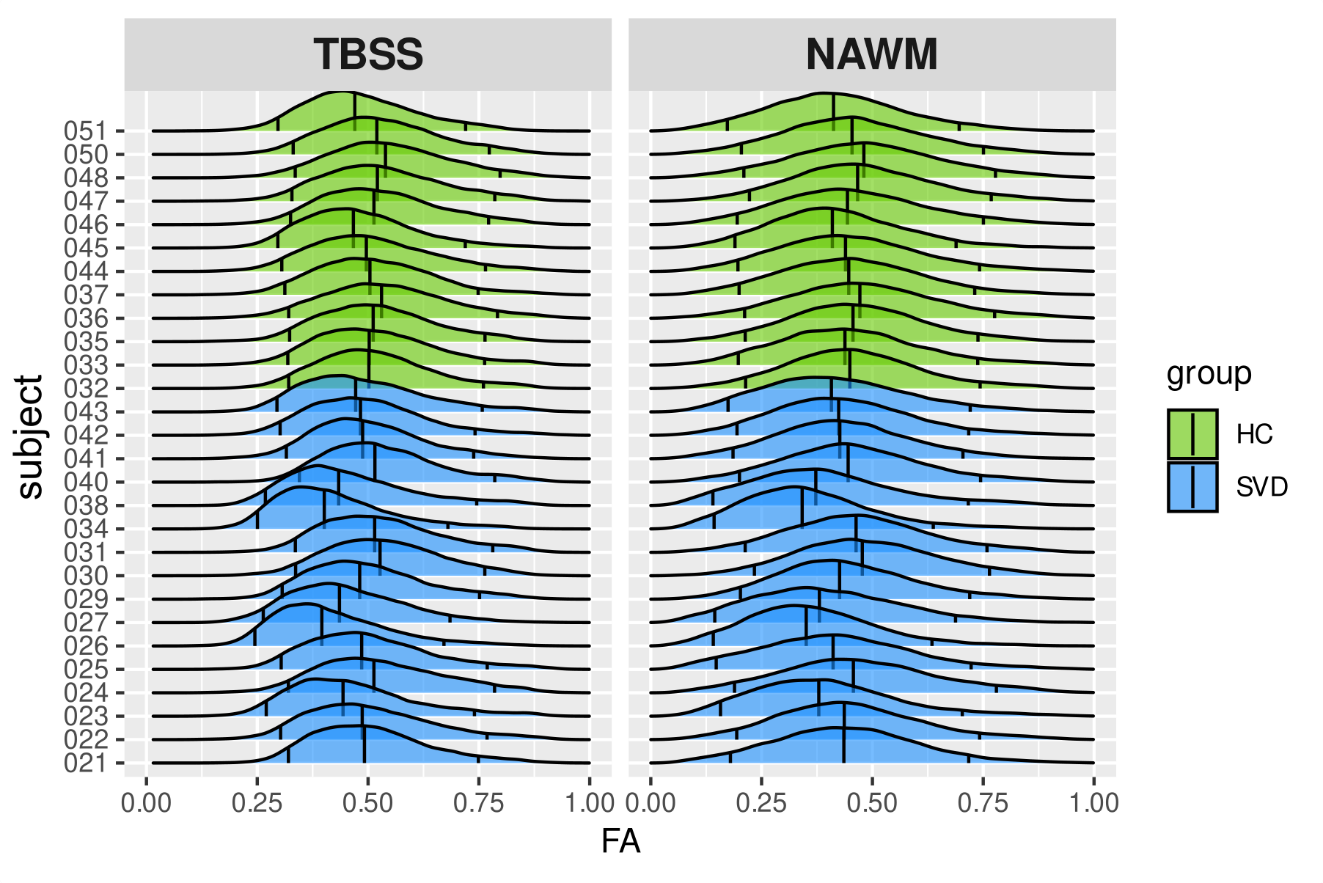


**Figure S2** – **Illustrative examples of MD histograms from all subjects obtained using the different masks: TBSS (left) and NAWM (right);** and demonstrating the histogram-based metrics (median and peak width).


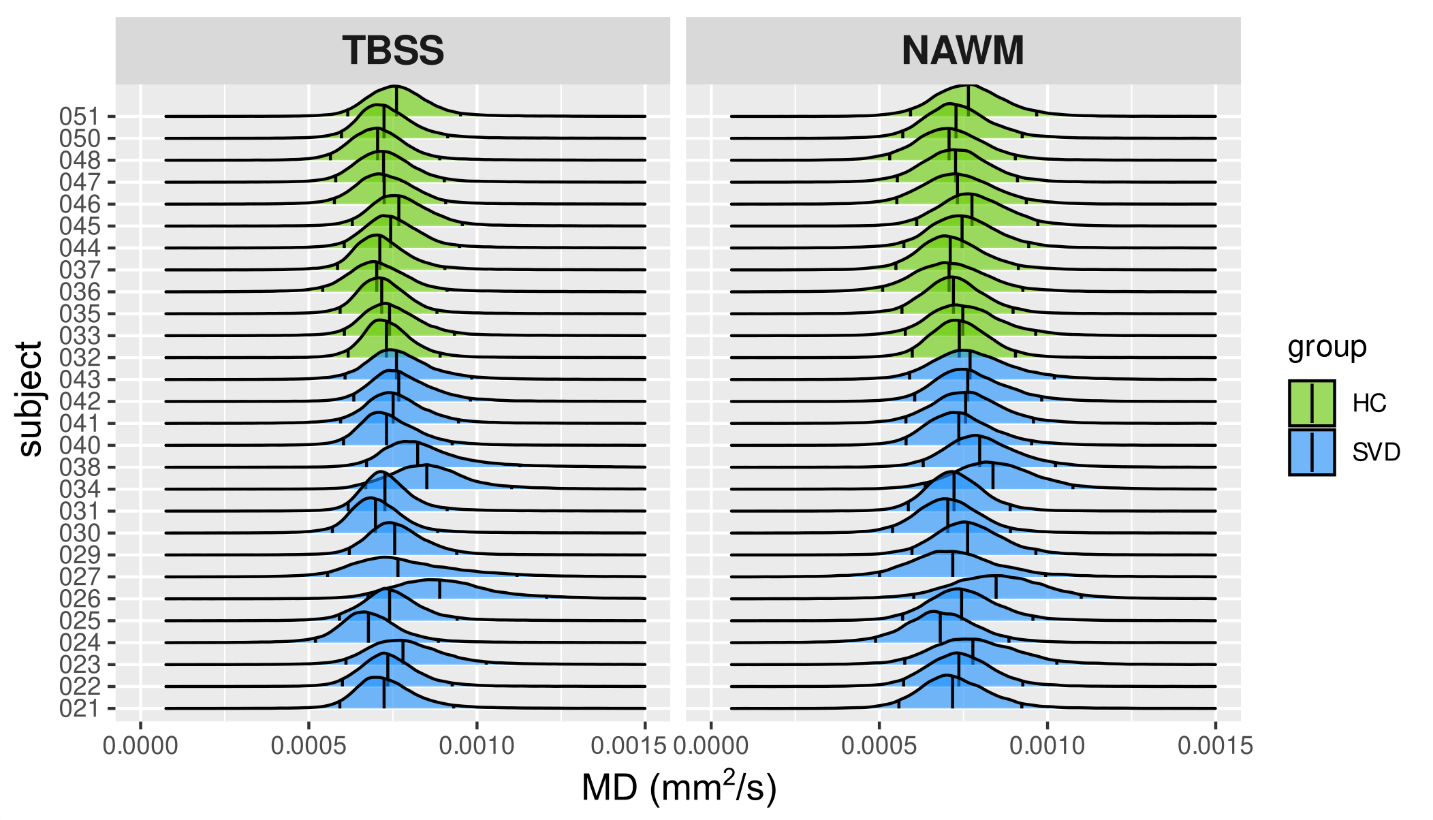


**Figure S3** – **Illustrative examples of scatter plots showing the relationship between one DTI metric and both cognitive domains.** In this example, the relation between *MD peak width* for both masks: *TBSS and NAWM*; executive function (upper panel) and processing speed (lower panel) are displayed. The correlation coefficients (r), uncorrected p-values and 95% confidence interval (gray area) are reported.


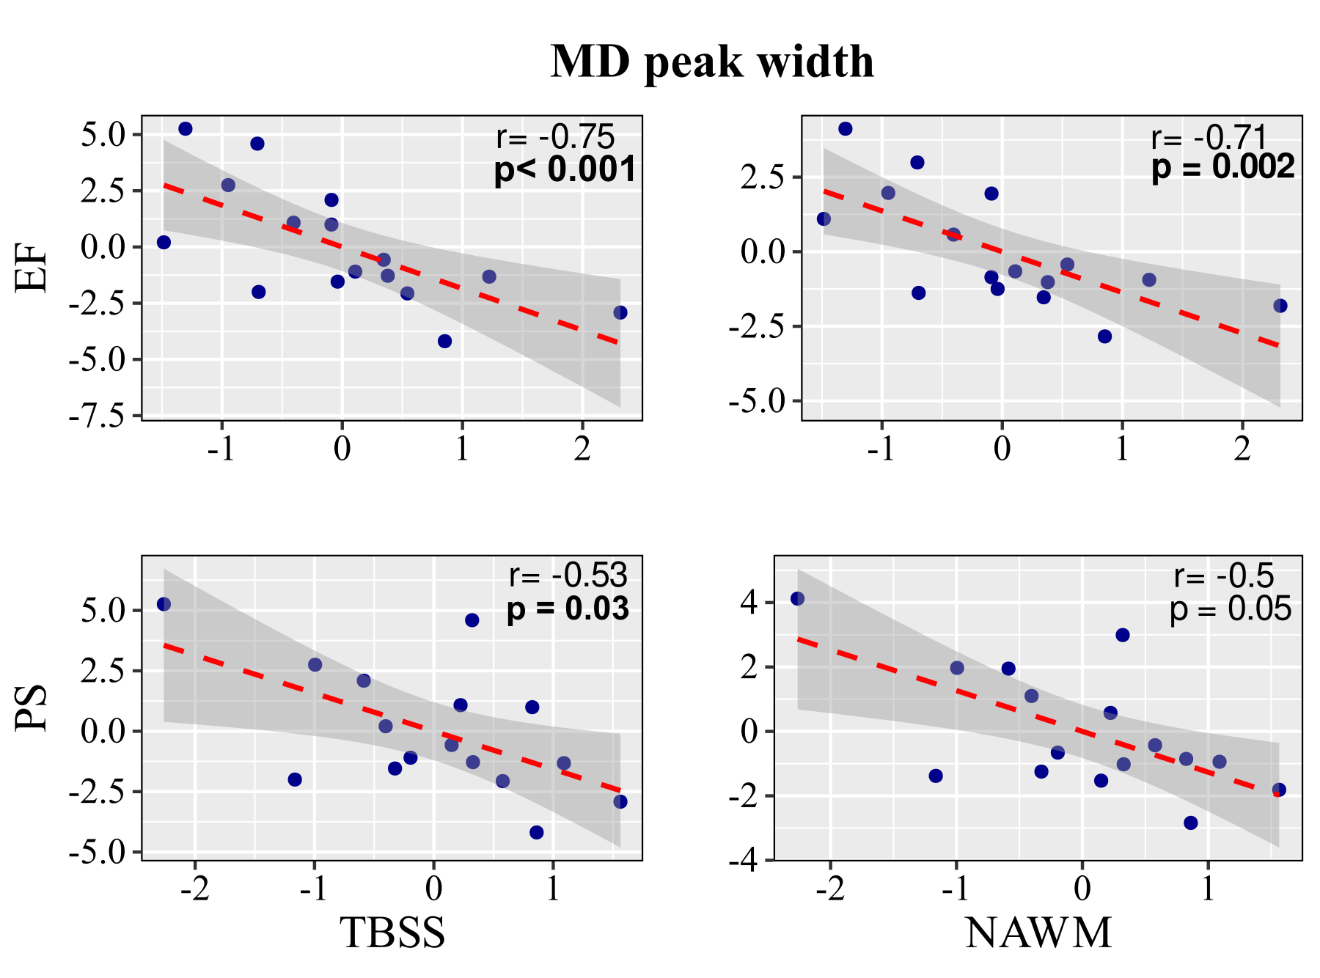


**Figure S4** – **Illustrative examples of scatter plots showing the relationship between one DTI metric and both cognitive domains.** In this example, the relation between *MD peak height* for both masks: *TBSS and NAWM*; executive function (upper panel) and processing speed (lower panel) are displayed. The correlation coefficients (r), uncorrected p-values and 95% confidence interval (gray area) are reported.


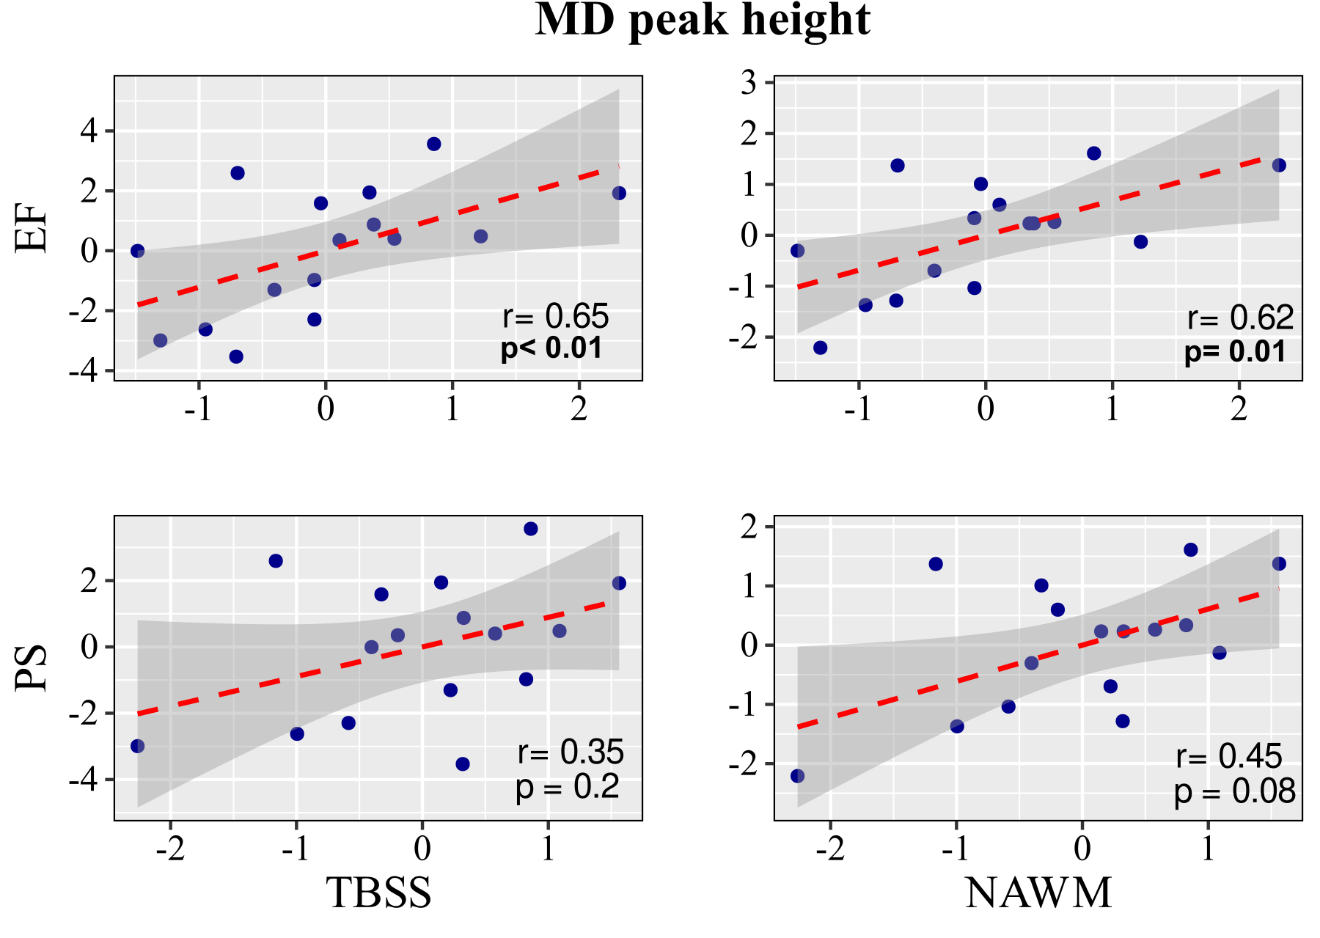

Supplement: Supplementary file 1 [file 7932f258dc777a317f03e464.docx]
